# Supplementary material
Source: PubMed Central journal article supplement (PMC1180733)
Supplement: bj3890821add.pdf [file bj3890821add.pdf]

## Supplementary Materials

**Supplementary Table S1 Primers used for quantitative PCR analysis**

| Target | Accession number | Forward primer (5'-3')            | Reverse primer (5'-3)           |
|--------|------------------|-----------------------------------|---------------------------------|
| TRPC 1 | AF061266         | 2086-<br>CACACCTCCAAAGGCAAGGTC    | 2213-<br>CGCATGGAGGTCAGGTATCG   |
| TRPC 2 | AF136401         | 368-<br>CAGCCAGCGGTAGTGCGTC       | 517-<br>GCAGGCCAGTGTGAGTGGAG    |
| TRPC 3 | NM_021771        | 549-<br>CGTAGTAGGTGTGCTGGACCTGTG  | 653-<br>GCCTTGTGCCCCTGTCTCT     |
| TRPC 4 | NM_053434        | 2004-<br>CCCTGCCTACACCTTTCAATGTC  | 2077-<br>GTGCGTCCATATCCAATTGACC |
| TRPC 5 | NM_080898        | 1584-<br>AAATAAAGGAAATGTGGGATGGTG | 1733-<br>TTCCCTTGGACGAGAACCATT  |
| TRPC 6 | NM_053559        | 1328-<br>TAGCACATGCGGCCTCCTT      | 1405-<br>GCTTGGTGCCTTCAAATCTGTC |
| TRPC 7 | NM_012035.1      | 1057-<br>GTTTCGTTGCTCACCTAACTGTC  | 1165-<br>CCAAAGACAGCCAGGAATTTCA |

**Supplementary Table S2 Validation of calibration methods for analysis of TRPC expression levels**

We used both  $\beta$ -actin and TBP for calibration in our initial analysis of cell lines 244 and 264. The results ( $\Delta(C_T^{TBP} - C_T^{\beta\text{-actin}})$ ) show that the relative level of the RNA for each housekeeping protein is the same in both cell lines. In all subsequent work, only  $\beta$ -actin was used for calibration. Results are means  $\pm$  S.E.means from 12 independent PCR reactions.

| Cell line | $C_T^{\beta\text{-actin}}$ | $C_T^{TBP}$      | $\Delta(C_T^{TBP} - C_T^{\beta\text{-actin}})$ |
|-----------|----------------------------|------------------|------------------------------------------------|
| 244       | 19.23 $\pm$ 0.59           | 28.04 $\pm$ 0.58 | 8.81 $\pm$ 0.89                                |
| 264       | 19.94 $\pm$ 0.59           | 28.06 $\pm$ 0.47 | 8.12 $\pm$ 0.82                                |

### Supplementary Table S3 Expression of RNAs for TRPCs in different A7r5 cell lines

The TRPC expression profile is shown for 6 cell lines in which the effects of AVP on CCE and NCCE were characterized immediately before the cells were frozen and the RNA then extracted from the frozen cells (see Experimental). Cells are categorized according to whether AVP evoked  $\text{Sr}^{2+}$  entry via the NCCE pathway under conditions where CCE was inhibited. In the cells lacking NCCE, AVP failed also to inhibit CCE. For each TRPC,  $\Delta C_T (= C_T^{\text{TRPC}} - C_T^{\beta\text{-actin}})$  was calculated using  $\beta$ -actin expression for calibration. Results are means  $\pm$  S.E.mean of 3 independent PCR reactions. <sup>a</sup>The primers for TRPC3 apparently interfered with amplification of the  $\beta$ -actin PCR product. In only these reactions, therefore, TRPC3 and  $\beta$ -actin were quantified in parallel assays of the same RNA extracts. In the cell lines (264 and 381) where TRPC3 was not detected after 43 cycles,  $C_T$  values for  $\beta$ -actin were 25 and 27, respectively. <sup>b</sup>In all cell lines, TRPC7 product was not detected after 40 cycles, and in line 381 TRPC2 was undetected after 40 cycles.  $C_T$  for  $\beta$ -actin in these reactions was  $23 \pm 2$  (for TRPC7) and  $24.9 \pm 0.3$  (for TRPC2).

| Expression of NCCE | Cell code | $\Delta C_T$    |                   |                    |                  |                  |                 |                    |
|--------------------|-----------|-----------------|-------------------|--------------------|------------------|------------------|-----------------|--------------------|
|                    |           | TRPC1           | TRPC2             | <sup>a</sup> TRPC3 | TRPC4            | TRPC5            | TRPC6           | <sup>b</sup> TRPC7 |
| +                  | 94        | 4.35 $\pm$ 0.53 | 5.60 $\pm$ 0.05   | 6.74 $\pm$ 0.83    | 7.18 $\pm$ 0.16  | 10.36 $\pm$ 0.64 | 3.97 $\pm$ 0.61 | >17                |
| +                  | 114       | 4.03 $\pm$ 0.02 | 4.14 $\pm$ 0.36   | 5.34 $\pm$ 0.66    | 6.64 $\pm$ 0.81  | 7.91 $\pm$ 0.80  | 3.52 $\pm$ 0.36 | >17                |
| +                  | 244       | 2.05 $\pm$ 0.21 | 9.30 $\pm$ 0.17   | 7.20 $\pm$ 0.32    | 7.42 $\pm$ 0.47  | 15.44 $\pm$ 0.88 | 3.89 $\pm$ 0.65 | >17                |
| +                  | 250       | 4.93 $\pm$ 0.33 | 3.13 $\pm$ 0.27   | 4.41 $\pm$ 0.19    | 5.64 $\pm$ 0.54  | 8.47 $\pm$ 0.17  | 2.62 $\pm$ 0.14 | >17                |
| -                  | 264       | 2.70 $\pm$ 1.19 | 6.59 $\pm$ 0.68   | >18                | 10.13 $\pm$ 0.25 | 14.24 $\pm$ 0.10 | 8.89 $\pm$ 0.62 | >17                |
| -                  | 381       | 5.77 $\pm$ 0.56 | > <sup>b</sup> 15 | >16                | 8.60 $\pm$ 0.53  | 11.05 $\pm$ 0.54 | 8.74 $\pm$ 0.60 | >17                |

**Supplementary Table S4 Expression of RNA for TRPCs in A7r5 cell lines with and without NCCE: Summary**

Summary of data presented in Table S3.

|              | $\Delta C_T$ |           |           |           |            |           |                    |
|--------------|--------------|-----------|-----------|-----------|------------|-----------|--------------------|
|              | TRPC1        | TRPC2     | TRPC3     | TRPC4     | TRPC5      | TRPC6     | <sup>b</sup> TRPC7 |
| with<br>NCCE | 3.84±0.63    | 5.54±1.35 | 5.92±0.64 | 6.72±0.40 | 10.55±1.71 | 3.50±0.31 | >17                |
| no<br>NCCE   | 4.24±3.07    | >11       | >17       | 9.36±1.54 | 12.65±3.19 | 8.82±0.15 | >17                |
